# THE AMERICAN JOURNAL OF PSYCHIATRY

---

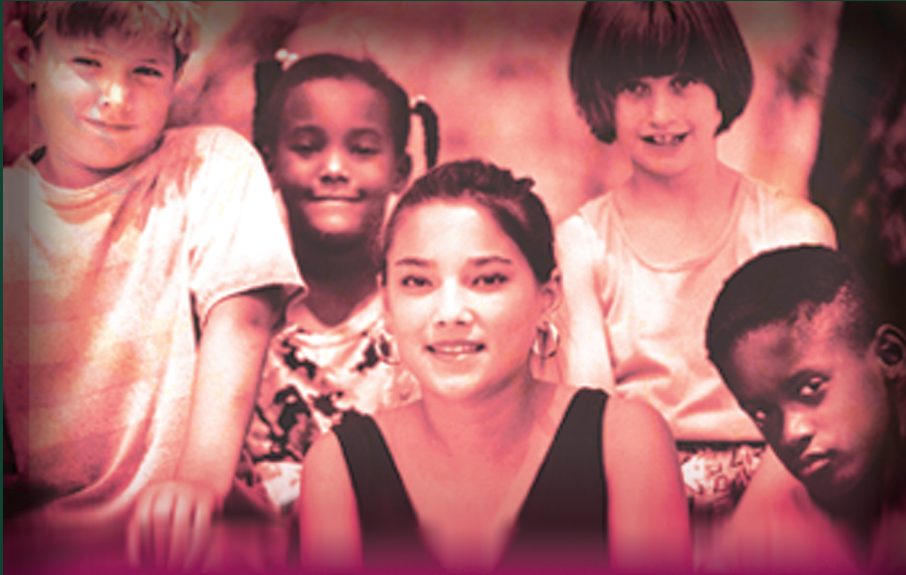

Tina worried about many things, such as contracting illnesses from classmates, world events in the news, being on time for scheduled activities, getting everything right

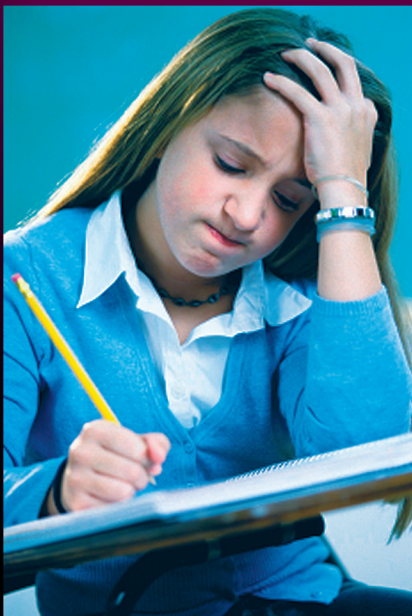

at school, and her mother forgetting to pick her up as planned (which had never happened). She complained daily of stomachaches, headaches, and neck and leg pain. She picked at her cuticles, and had difficulty falling asleep because of worrying. She often went to her parents in the middle of the night because of a nightmare or physical complaint. Tina had always been anxious and nervous and needed constant reassurance.

**Physiologic Reactivity Despite Emotional Resilience Several Years After Direct Exposure to Terrorism**

Phebe M. Tucker et al. 230

**A Randomized Controlled Clinical Trial of Psychoanalytic Psychotherapy for Panic Disorder**

Barbara Milrod et al. 265

**Efficacy and Safety of Extended-Release Venlafaxine in the Treatment of Generalized Anxiety Disorder in Children and Adolescents: Two Placebo-Controlled Trials**

Moira A. Rynn et al. 290

**Different Psychophysiological and Behavioral Responses Elicited by Frustration in Pediatric Bipolar Disorder and Severe Mood Dysregulation**

Brendan A. Rich et al. 309

**Continuing Medical Education** 372

**February 2007**

**Volume 164 • Number 2**

---

Official Journal of the  
AMERICAN PSYCHIATRIC ASSOCIATION

---

[ajp.psychiatryonline.org](http://ajp.psychiatryonline.org)
