# THE AMERICAN JOURNAL OF PSYCHIATRY

---

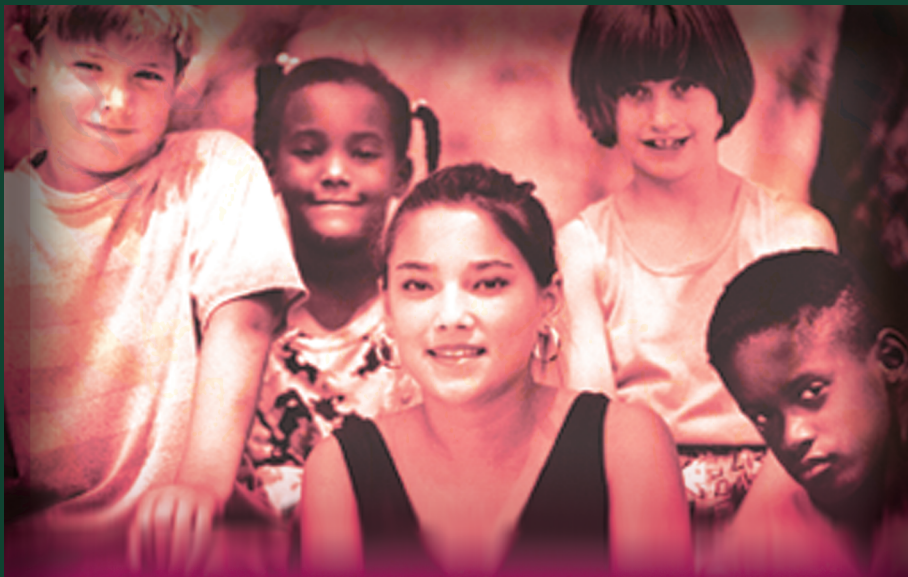

Tina worried about many things, such as contracting illnesses from classmates, world events in the news, being on time for scheduled activities, getting everything right

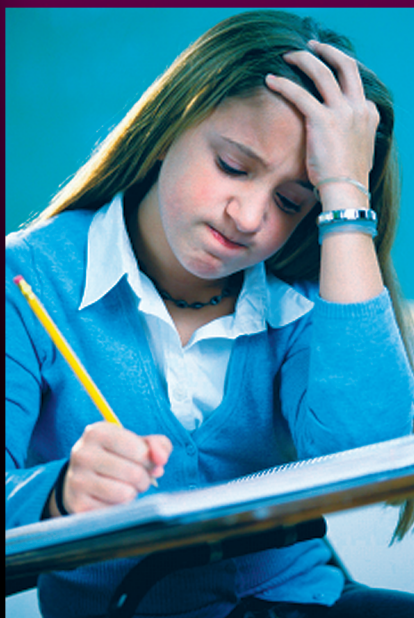

at school, and her mother forgetting to pick her up as planned (which had never happened). She complained daily of stomachaches, headaches, and neck and leg pain. She picked at her cuticles, and had difficulty falling asleep because of worrying. She often went to her parents in the middle of the night because of a nightmare or physical complaint. Tina had always been anxious and nervous and needed constant reassurance.

**Physiologic Reactivity Despite Emotional Resilience Several Years After Direct Exposure to Terrorism**  
Phebe M. Tucker et al. 230

**A Randomized Controlled Clinical Trial of Psychoanalytic Psychotherapy for Panic Disorder**  
Barbara Milrod et al. 265

**Efficacy and Safety of Extended-Release Venlafaxine in the Treatment of Generalized Anxiety Disorder in Children and Adolescents: Two Placebo-Controlled Trials**  
Moira A. Rynn et al. 290

**Different Psychophysiological and Behavioral Responses Elicited by Frustration in Pediatric Bipolar Disorder and Severe Mood Dysregulation**  
Brendan A. Rich et al. 309

**Continuing Medical Education** 372

**February 2007**

**Volume 164 • Number 2**

---

Official Journal of the  
AMERICAN PSYCHIATRIC ASSOCIATION

---

[ajp.psychiatryonline.org](http://ajp.psychiatryonline.org)

# THE AMERICAN JOURNAL OF PSYCHIATRY

Official Journal of the American Psychiatric Association

## Instructions for Activating Your Online Subscription

All subscribers to the print edition of *The American Journal of Psychiatry* are automatically eligible to view the *Journal* online. The online version of the *Journal* allows you to conduct searches for topics of interest in issues going all the way back to 1844. Plus the only way readers can participate in the *Journal's* new CME Course program is to have an activated online subscription (note: there is an additional annual fee to be enrolled and eligible to receive up to 36 hours of category 1 CME credit).

To activate your online subscription:

Make sure you have your customer identification number available. This number is printed on your *Journal* mailing label, directly above your name and address. If you cannot locate this number, please contact American Psychiatric Publishing, Inc., through one of the following methods:

- e-mail: [accessnumber@psych.org](mailto:accessnumber@psych.org)
- phone: (800) 368-5777
- fax: (703) 907-1091
- mail:

American Psychiatric Publishing, Inc.  
1000 Wilson Blvd., Suite 1825  
Arlington, VA 22209-3901  
Attn: Circulation Department.

Internet: <http://www.psychiatryonline.org>. Click on the "Subscriptions" button located near the bottom of the page. Then click on the appropriate link:

- ACTIVATE Your Member or Individual (Nonmember) Subscription

For APA Members, you will find your member number on the mailing label above your name. It is

a 10-digit number beginning with zeros. Enter your number in the box and click the SUBMIT button.

For Individual Nonmembers and Institutions, your customer number is on the mailing label above your name. It is a 10-digit number beginning with 22 or 30. Enter this number in the box and click the SUBMIT button.

Fill out all the information on the next screen and press the "Send Form" button at the bottom on the right.

When finished, click the "Done" button. You will receive an e-mail confirmation that your subscription has been activated.

**Continuing Medical Education:** You now have an opportunity to earn CME credits by reading articles in *The American Journal of Psychiatry*. Three articles in each issue will each comprise a short course for up to 1 hour category 1 CME credit each. The course comprises reading the article and answering three multiple-choice questions with a single correct answer. CME Credit is issued only online. Readers who want credit must subscribe to the AJP Continuing Medical Education Course program (APA Members: \$97.00 per year; Nonmember subscribers: \$144.00 per year; nonmember nonsubscribers: \$180.00 per year). Go to [cme.psychiatryonline.org](http://cme.psychiatryonline.org), select *The American Journal of Psychiatry* at that site, take the course(s) of your choosing, complete the evaluation form, and submit your answers for CME credit. In the online course, correct answers will be highlighted for your reference; there is no minimum threshold score necessary for the credit. A link from the question to the correct answer in context will be highlighted in the associated article. A certificate for each course will be generated upon successful completion.

The American Journal of Psychiatry is online at [ajp.psychiatryonline.org](http://ajp.psychiatryonline.org)

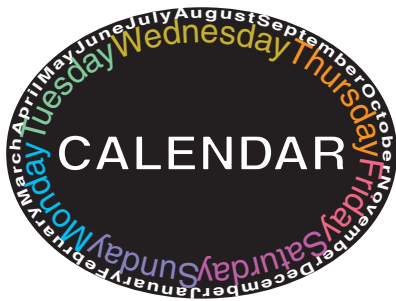

For free listing of your organization's official annual or regional meeting, please send us the following information: sponsor, location, inclusive dates, type and number of continuing education credits (if available), and the name, address, and telephone number of the person or group to contact for more information. In order for an event to appear in our listing, all notices and changes must be received at least 6 months in advance of the meeting and should be addressed to:

*Calendar, American Journal of Psychiatry, 1000 Wilson Boulevard, Suite 1825, Arlington, VA 22209-3901, jblair@psych.org (e-mail).*

*Because of space limitations, only listings of meetings of the greatest interest to Journal readers will be included.*

## FEBRUARY

**February 17–20**, 18th Annual Meeting of American Neuropsychiatric Association, Tucson, AZ. Contact: American Neuropsychiatric Association, 700 Ackerman Road, Suite 625, Columbus, Ohio 43202; (614) 447-2077 (tel), [anpa@osu.edu](mailto:anpa@osu.edu) (e-mail), [www.anpaonline.org](http://www.anpaonline.org) (web-site).

**February 19–23**, 16th Annual Psychopharmacology Review, Tucson, AZ. Contact: Professional Development Office, University of Arizona College of Medicine, Department of Psychiatry, PO Box 245002, 1501 N Campbell, #7423, Tucson, AZ 85724-5002; (520) 626-1392 (tel), (520) 626-5732 (fax), [uapsycon@email.arizona.edu](mailto:uapsycon@email.arizona.edu) (e-mail), [www.psychiatry.arizona.edu](http://www.psychiatry.arizona.edu) (web site).

**February 21–25**, Annual meeting of the American College of Psychiatrists, Rancho Mirage, California. Contact: American College of Psychiatrists, 122 S. Michigan Ave., Ste. 1360, Chicago, IL 60603; (312) 662-1020 (tel), (312) 662-1025 (fax), [maureen@acpsych.org](mailto:maureen@acpsych.org) (e-mail).

**February 22-23**, The British Neuropsychiatry Association 20th Anniversary Annual Meeting: Neuropsychiatry and Neuroscience, Epilepsy and Parkinson's Disease, London. Contact: Jackie Ashmenall, St Aidan, Ealing Green, Ealing, London W5 5EN; [jashmenall@yahoo.com](mailto:jashmenall@yahoo.com) (e-mail).

## MARCH

**March 1–4**, 20th Annual Meeting of the American Association for Geriatric Psychiatry, New Orleans. Contact: AAGP, 7910 Woodmont Ave., Ste. 1050, Bethesda, MD 20814-3004; (301) 654-7850 (tel), (301) 654-4137 (fax), [www.aagp-meeting.org](http://www.aagp-meeting.org) (web site).

**March 17–21**, 15th European Congress of Psychiatry, Madrid. Contact: Kenes International – Global Congress Organisers and Association Management Services, 17 Rue du Cendrier, PO Box 1726, CH-1211 Geneva 1, Switzerland; (41) 22 908 0488 (tel), (41) 22 732 2850 (fax), [aep2007@kenes.com](mailto:aep2007@kenes.com) (e-mail), [www.kenes.com/aep2007](http://www.kenes.com/aep2007) (web site).

**March 30-Apr 1**, 33rd Annual American Academy of Clinical Psychiatrists Conference, Washington, DC. Contact: American Academy of Clinical Psychiatrists, P.O. Box 458, Glastonbury, CT 06033-0458; (860) 833-5045 (tel), (860) 833-6023 (fax), [aacp@cox.net](mailto:aacp@cox.net) (e-mail), [www.aacp.com](http://www.aacp.com) (web-site).

## APRIL

**April 18–21**, 28th Annual Meeting and Scientific Sessions of the Society of Behavioral Medicine, Miami Beach. Contact: Society of Behavioral Medicine, 17000 Commerce Parkway, Ste. C, Mount Laurel, NJ 08054; (856) 439-1297 (tel), (856) 439-0525 (fax), [info@sbm.org](mailto:info@sbm.org) (e-mail).

**April 26–29**, 25th Annual Symposium of the American College of Forensic Psychiatry, Santa Fe, NM. Contact: American College of Forensic Psychiatry, P.O. Box 5870, Balboa Island, CA 92662; (949) 673-7773 (tel), (949) 673-7710 (fax), [psychlaw@sover.net](mailto:psychlaw@sover.net) (e-mail), [www.forensicpsychonline.com](http://www.forensicpsychonline.com) (web site).

## MAY

**May 17–20**, The 51st Annual Meeting of the American Academy of Psychoanalysis and Dynamic Psychiatry, San Diego. Contact: Executive Office, American Academy of Psychoanalysis and Dynamic Psychiatry, P. O. Box 30, Bloomfield, CT 06002; (888) 691-8281 (tel), (888) 286-

0787 (fax), [aap@ssmgt.com](mailto:aap@ssmgt.com) (e-mail), [www.aapdp.org](http://www.aapdp.org) (web site).

**May 19–24**, 160th Annual Meeting of the American Psychiatric Association, San Diego. Contact: Cathy Nash, APA Annual Meetings Dept., 1000 Wilson Blvd., Ste. 1825, Arlington, VA 22209; (703) 907-7822.

## OCTOBER

**October 6–7**, 6th NYU Reproductive Psychiatry Conference, New York. Contact: Dr. Shari I. Lusskin, Director of Reproductive Psychiatry, New York University School of Medicine, 155 East 29th Street, Suite 26J, New York, NY 10016; (212) 263-5295 (tel), [www.med.nyu.edu/cme](http://www.med.nyu.edu/cme) (web-site).

**October 7–11**, 15th World Congress on Psychiatric Genetics, New York. Contact: Lynn E DeLisi, International Society of Psychiatric Genetics, NYU School of Medicine, 650 First Avenue, 5th Floor Room 543, New York, NY 10016; (212) 263-3420 (tel), (212) 263-3407 (fax).

**October 11-14**, 59th Institute on Psychiatric Services, American Psychiatric Association, New Orleans, LA. Contact: Jill Gruber, APA Annual Meetings Dept., 1000 Wilson Blvd., Ste. 1825, Arlington, VA 22209; (703) 907-7815.

**October 12-15**, Annual Meeting of the Society for the Study of Psychiatry and Culture (SSPC), Hyatt Regency Capitol Hill, Washington, DC. Contact: Jim Boehnlein or Shannon Squire, (503) 220-3481, [shannon.squire@med.va.gov](mailto:shannon.squire@med.va.gov) (e-mail).

**October 23–28**, 54th Annual Meeting of the American Academy of Child and Adolescent Psychiatry, Boston. Contact: AACAP, 3615 Wisconsin Avenue, N.W., Washington, DC 20016-3007; (202) 966-7300 (tel), (202) 966-2891 (fax), [meetings@aacap.org](mailto:meetings@aacap.org) (e-mail), [www.aacap.org](http://www.aacap.org) (web site).

*Continued on page A49*

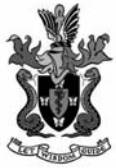

# THE BRITISH JOURNAL OF PSYCHIATRY

January 2007, VOL. 190

<http://bjp.rcpsych.org>

A0 Editorial Board

A1 Highlights of this issue

A2 Psychiatry in pictures

## EDITORIALS

1 **Gene—environment interplay in attention-deficit hyperactivity disorder and the importance of a developmental perspective**

A. Thapar, K. Langley, P. Asherson, and M. Gill

4 **Adult attention-deficit hyperactivity disorder: recognition and treatment in general adult psychiatry**

P. Asherson, W. Chen, B. Craddock, and E. Taylor

## REVIEW ARTICLES

6 **Mood disorders and migration. Meta-analysis**  
S.G.H.A. Swinnen and J.-P. Selten

11 **Psychosocial interventions following self-harm. Systematic review of their efficacy in preventing suicide**  
M.J. Crawford, O. Thomas, N. Khan, and E. Kulinskaya

## PAPERS

18 **Adolescent-onset psychosis: prevalence, needs and service provision**  
L. Boeing, V. Murray, A. Pelosi, R. McCabe, D. Blackwood, and R. Wrate

27 **Mental ill-health in adults with intellectual disabilities: prevalence and associated factors**  
S.-A. Cooper, E. Smiley, J. Morrison, A. Williamson, and L. Allan

36 **Life stress and depression in a tribal area of Pakistan**  
N. Husain, I.B. Chaudhry, M.A. Afridi, B. Tomenson, and F. Creed

42 **Psychiatric and psychosocial predictors of substance use disorders among adolescents. Longitudinal study**  
S.S.F. Gau, M.-Y. Chong, P. Yang, C.-F. Yen, K.-Y. Liang, and A.T.A. Cheng

49 **Efficacy of the Community Re-Entry Module for patients with schizophrenia in Beijing, China: outcome at 2-year follow-up**

Y.-T. Xiang, Y.-Z. Weng, W.-Y. Li, L. Gao, G.-L. Chen, L. Xie, Y.-L. Chang, W.-K. Tang, and G.S. Ungvari

57 **Competition for neuronal resources: how hallucinations make themselves heard**

D. Hubl, T. Koenig, W.K. Strik, L.M. Garcia, and T. Dierks

63 **Changes in regional cerebral blood flow during acute electroconvulsive therapy in patients with depression. Positron emission tomographic study**

H. Takano, N. Motohashi, T. Uema, K. Ogawa, T. Ohnishi, M. Nishikawa, H. Kashima, and H. Matsuda

69 **Distribution of CORE-OM scores in a general population, clinical cut-off points and comparison with the CIS-R**

J. Connell, M. Barkham, W.B. Stiles, E. Twigg, N. Singleton, O. Evans, and J.N.V. Miles

## SHORT REPORTS

75 **Perceived discrimination and psychological distress in Sweden**  
S. Wamala, G. Boström, and K. Nyqvist

77 **Contribution of low- and middle-income countries to research published in leading general psychiatry journals, 2002–2004**  
V. Patel and Y.-R. Kim

## COLUMNS

79 Correspondence

82 One hundred years ago

83 Book reviews

84 Instructions for authors

88 Contents of the *American Journal of Psychiatry*

89 Contents of *Advances in Psychiatric Treatment*

90 From the Editor's desk

# Psychological Medicine

Volume 36 Number 12 December 2006

## CONTENTS

|                                                                                                                                                                                                                                                                                                                     |      |                                                                                                                                                                                                                                            |      |
|---------------------------------------------------------------------------------------------------------------------------------------------------------------------------------------------------------------------------------------------------------------------------------------------------------------------|------|--------------------------------------------------------------------------------------------------------------------------------------------------------------------------------------------------------------------------------------------|------|
| In this Issue                                                                                                                                                                                                                                                                                                       | 1659 | <b>A risk index for 12-month suicide attempts in the National Comorbidity Survey Replication (NCS-R)</b> BORGES, G., ANGST, J., NOCK, M.K., RUSCIO, A.M., WALTERS, E.E., AND KESSLER, R.C.                                                 | 1747 |
| <b>EDITORIAL</b>                                                                                                                                                                                                                                                                                                    |      |                                                                                                                                                                                                                                            |      |
| Valedictory PAYKEL, E.S.                                                                                                                                                                                                                                                                                            | 1661 | <b>Socio-economic and psychological correlates of suicidality among Hong Kong working-age adults: results from a population-based survey</b> LIU, K.Y., CHEN, E.Y.H., CHAN, C.L.W., LEE, D.T.S., LAW, F.Y.K., CONWELL, Y., AND YIP, P.S.F. | 1759 |
| <b>EDITORIAL REVIEW</b>                                                                                                                                                                                                                                                                                             |      |                                                                                                                                                                                                                                            |      |
| <b>To treat or not to treat: maternal depression, SSRI use in pregnancy and adverse neonatal effects</b> AUSTIN, M.-P.                                                                                                                                                                                              | 1663 | <b>Childhood adversities and risk for suicidal ideation and attempts: a longitudinal population-based study</b> ENNS, M.W., COX, B.J., AFIFI, T.O., DE GRAAF, R., TEN HAVE, M., AND SAREEN, J.                                             | 1769 |
| <b>REVIEW ARTICLES</b>                                                                                                                                                                                                                                                                                              |      |                                                                                                                                                                                                                                            |      |
| <b>The feasibility and need for dimensional psychiatric diagnoses</b> HELZER, J.E., KRAEMER, H.C., AND KRUEGER, R.F.                                                                                                                                                                                                | 1671 | <b>Aggressiveness, not impulsiveness or hostility, distinguishes suicide attempters with major depression</b> KEILP, J.G., GORLYN, M., OQUENDO, M.A., BRODSKY, B., ELLIS, S.P., STANLEY, B., AND MANN, J.J.                                | 1779 |
| <b>Systematic review of resource utilization in the hospital management of deliberate self-harm</b> SINCLAIR, J.M.A., GRAY, A., AND HAWTON, K.                                                                                                                                                                      | 1681 | <b>Autism spectrum disorder and psychopathy: shared cognitive underpinnings or double hit?</b> ROGERS, J., VIDING, E., BLAIR, R.J., FRITH, U., AND HAPPÉ, F.                                                                               | 1789 |
| <b>ORIGINAL ARTICLES</b>                                                                                                                                                                                                                                                                                            |      |                                                                                                                                                                                                                                            |      |
| <b>DSM-IV alcohol dependence: a categorical or dimensional phenotype?</b> HASIN, D.S., LIU X., ALDERSON, D., AND GRANT, B.F.                                                                                                                                                                                        | 1695 | <b>Bipolar I and bipolar II disorder: cognition and emotion processing</b> SUMMERS, M., PAPADOPOULOU, K., BRUNO, S., CIPOLLOTTI, L., AND RON, M.A.                                                                                         | 1799 |
| <b>Autobiographical memory in non-amnesic alcohol-dependent patients</b> D'ARGEMBEAU, A., VAN DER LINDEN, M., VERBANCK, P., AND NOËL, X.                                                                                                                                                                            | 1707 | <b>BOOK REVIEWS</b>                                                                                                                                                                                                                        |      |
| <b>Caffeine intake, toxicity and dependence and lifetime risk for psychiatric and substance use disorders: an epidemiologic and co-twin control analysis</b> KENDLER, K.S., MYERS, J., AND GARDNER, C.O.                                                                                                            | 1717 | <i>Principles of Therapeutic Change that Work</i> SOUTHAM-GEROW, M.A., AND MILLER, L.M.                                                                                                                                                    | 1811 |
| <b>Risk of postpartum depression in relation to dietary fish and fat intake in Japan: the Osaka Maternal and Child Health Study</b> MIYAKE, Y., SASAKI, S., YOKOYAMA, T., TANAKA, K., OHYA, Y., FUKUSHIMA, W., SAITO, K., OHFUJI, S., KIYOHARA, C., HIROTA, Y., AND THE OSAKA MATERNAL AND CHILD HEALTH STUDY GROUP | 1727 | <i>Psychiatric Genetics</i> ZAMMIT, S.                                                                                                                                                                                                     | 1812 |
| <b>Online randomized controlled trial of brief and full cognitive behaviour therapy for depression</b> CHRISTENSEN, H., GRIFFITHS, K.M., MACKINNON, A.J., AND BRITTLIFFE, K.                                                                                                                                        | 1737 | <i>The Science of Well-being</i> RØYSAMB, E.                                                                                                                                                                                               | 1813 |
|                                                                                                                                                                                                                                                                                                                     |      | <i>The Origins and Course of Common Mental Disorders</i> MALHI, G.S.                                                                                                                                                                       | 1815 |
|                                                                                                                                                                                                                                                                                                                     |      | <i>Social Capital and Mental Health</i> BRUGHHA, T.                                                                                                                                                                                        | 1816 |
|                                                                                                                                                                                                                                                                                                                     |      | <i>American Journal of Psychiatry Contents August 2006</i>                                                                                                                                                                                 | 1817 |

# Psychological Medicine

Volume 37 Number 1 January 2007

## CONTENTS

|                                                                                                                                                                                                                                                          |    |                                                                                                                                                                                                                                             |     |
|----------------------------------------------------------------------------------------------------------------------------------------------------------------------------------------------------------------------------------------------------------|----|---------------------------------------------------------------------------------------------------------------------------------------------------------------------------------------------------------------------------------------------|-----|
| In this Issue                                                                                                                                                                                                                                            | 1  | <b>A new scale to assess the therapeutic relationship in community mental health care: STAR</b><br>MCGUIRE-SNIECKUS, R., MCCABE, R., CATTY, J., AND PRIEBE, S.                                                                              | 85  |
| <b>REVIEW ARTICLE</b>                                                                                                                                                                                                                                    |    |                                                                                                                                                                                                                                             |     |
| <b>Randomized and non-randomized evidence for the effect of compulsory community and involuntary out-patient treatment on health service use: systematic review and meta-analysis</b> KISELY, S., CAMPBELL, L.A., SCOTT, A., PRESTON, N.J., AND XIAO, J. | 3  | <b>Functional and psychosocial impairment in adults with undiagnosed ADHD</b> ABLE, S.L., JOHNSTON, J.A., ADLER, L.A., AND SWINDLE, R.W.                                                                                                    | 97  |
| <b>ORIGINAL ARTICLES</b>                                                                                                                                                                                                                                 |    |                                                                                                                                                                                                                                             |     |
| <b>A common genetic factor explains the association between psychopathic personality and antisocial behavior</b> LARSSON, H., TUVBLAD, C., RIJSDIJK, F.V., ANDERSHED, H., GRANN, M., AND LICHTENSTEIN, P.                                                | 15 | <b>Sex differences in brain activation patterns during processing of positively and negatively valenced emotional words</b> HOFER, A., SIEDENTOPF, C.M., ISCHEBECK, A., RETTENBACHER, M.A., VERIUS, M., FELBER, S., AND FLEISCHHACKER, W.W. | 109 |
| <b>The different origins of stability and change in antisocial personality disorder symptoms</b> BURT, S.A., MCGUE, M., CARTER, L.A., AND IACONO, W.G.                                                                                                   | 27 | <b>Hippocampal <sup>1</sup>H MRS in patients with bipolar disorder taking valproate versus valproate plus quetiapine</b> ATMACA, M., YILDIRIM, H., OZDEMIR, H., OGUR, E., AND TEZCAN, E.                                                    | 121 |
| <b>Obsessive-compulsive disorder, tics and anxiety in 6-year-old twins</b> BOLTON, D., RIJSDIJK, F., O'CONNOR, T.G., PERRIN, S., AND ELEY, T.C.                                                                                                          | 39 | <b>Ovarian hormones and binge eating in bulimia nervosa</b> EDLER, C., LIPSON, S.F., AND KEEL, P.K.                                                                                                                                         | 131 |
| <b>Contrasting models of genetic co-morbidity for cannabis and other illicit drugs in adult Australian twins</b> AGRAWAL, A., LYNSKEY, M.T., BUCHOLZ, K.K., MARTIN, N.G., MADDEN, P.A.F., AND HEATH, A.C.                                                | 49 | <b>Predicting post-traumatic stress disorder: validation of the Trauma Screening Questionnaire in victims of assault</b> WALTERS, J.T.R., BISSON, J.I., AND SHEPHERD, J.P.                                                                  | 143 |
| <b>Lifetime prevalence and inter-cohort variation in DSM-IV disorders in metropolitan China</b> LEE, S., TSANG, A., ZHANG, M.-Y., HUANG, Y.-Q., HE, Y.-L., LIU, Z.-R., SHEN, Y.-C., AND KESSLER, R.C.                                                    | 61 | <b>BOOK REVIEWS</b>                                                                                                                                                                                                                         |     |
| <b>The use of complementary and alternative medicine in the general population: results from a longitudinal community study</b> RÖSSLER, W., LAUBER, C., ANGST, J., HAKER, H., GAMMA, A., EICH, D., KESSLER, R.C., AND AJDACIC-GROSS, V.                 | 73 | <i>Healing Psychiatry: Bridging the Science/Humanism Divide</i> ZACHAR, P.                                                                                                                                                                  | 151 |
|                                                                                                                                                                                                                                                          |    | <i>Child and Adolescent Psychiatry</i> MARTIN, A. AND HENDERSON, S.                                                                                                                                                                         | 152 |
|                                                                                                                                                                                                                                                          |    | <i>Women and Depression: A Handbook for the Social, Behavioral, and Biomedical Sciences</i> NADELSON, C.C.                                                                                                                                  | 153 |
|                                                                                                                                                                                                                                                          |    | <b>Acknowledgement to assessors</b>                                                                                                                                                                                                         | 155 |
|                                                                                                                                                                                                                                                          |    | <i>American Journal of Psychiatry</i> Contents September 2006                                                                                                                                                                               | 159 |

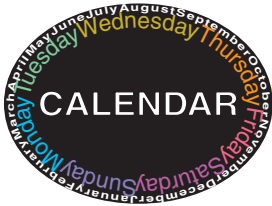

Continued from page A8

## FEBRUARY 2008

**February 15–18**, 21st Annual Meeting of the American Association for Geriatric Psychiatry, Washington, DC. Contact: AAGP, 7910 Woodmont Ave., Ste. 1050, Bethesda, MD 20814-3004; (301) 654-7850 (tel), (301) 654-4137 (fax), [www.aagpmeeting.org](http://www.aagpmeeting.org) (web site).

**February 27–March 2**, Annual meeting of the American College of Psychiatrists, Kauai, Hawaii. Contact: American College of Psychiatrists, 122 S. Michigan Ave., Ste. 1360, Chicago, IL 60603; (312) 662-1020 (tel), (312) 662-1025 (fax), [maureen@acpsych.org](mailto:maureen@acpsych.org) (e-mail).

## CONTENTS (Continued from page A5)

### APA Official Actions

356 APA Council Reports

### Other Items of Interest

372 Continuing Medical Education

A2 How to Activate Your Online Subscription

A8 Calendar

A15 Officers of the American Psychiatric Association

A28 The British Journal of Psychiatry contents (January 2007)

A40 Residents' Journal

A47 Psychological Medicine contents (December 2006)

A48 Psychological Medicine contents (January 2007)

A55 Index to Advertisers

### Cover

Anxiety disorders are the most common psychiatric disorders, in adults as well as in children and adolescents. Because these disorders often have their onset in childhood, they can have lifelong effects on health, productivity, and quality of life. The lower image and text are from Rynn et al. whose study on venlafaxine in the treatment of children and adolescents with generalized anxiety disorder appears in this issue (p. 290). The upper image is courtesy of the Anxiety Disorders Association of America, a national organization dedicated to advancing treatment, education and research about anxiety disorders and comorbid conditions and improving the lives of all who suffer from them. Contact the Anxiety Disorders Association of America at [www.adaa.org](http://www.adaa.org). Cover design by Jason Glance.

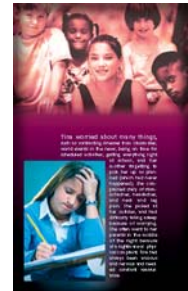

## Coming in the March 2007 issue

### THE AMERICAN JOURNAL OF PSYCHIATRY

#### *Effectiveness of Olanzapine, Quetiapine, and Risperidone in Patients With Chronic Schizophrenia After Discontinuing Perphenazine*

T.S. Stroup, J.A. Lieberman, J.P. McEvoy, M.S. Swartz, S.M. Davis, G. Capuano, R. Rosenheck, R.S.E. Keefe, A. Miller, and I. Belz

#### *Effects of Antipsychotic Medications on Psychosocial Functioning in Patients With Chronic Schizophrenia: Findings from the NIMH CATIE Study*

M.S. Swartz, D.O. Perkins, T.S. Stroup, S.M. Davis, G. Capuano, R.A. Rosenheck, F. Reimherr, M.F. McGee, R.S.E. Keefe, J.P. McEvoy, and J.A. Lieberman

#### *Employment Outcomes in a Randomized Trial of Second-Generation Antipsychotics and Perphenazine in the Treatment of Individuals With Schizophrenia*

S.G. Resnick, R.A. Rosenheck, J.M. Canive, C. D'Souza, T.S. Stroup, J.P. McEvoy, S.M. Davis, R.S.E. Keefe, M.S. Swartz, and J.A. Lieberman

#### *Cognitive Training for Supported Employment: 2-3 Year Outcomes of a Randomized Controlled Trial*

S.R. McGurk, K.T. Mueser, K. Feldman, R. Wolfe, and P. Alysia
